# Supplementary material for: DNA methylation changes during long-term in vitro cell culture are caused by epigenetic drift
Source: PubMed Central journal article supplement (PMC8134454; doi:10.1038/s42003-021-02116-y), 2021-05-19
Supplement: 42003_2021_2116_MOESM3_ESM.pdf [file 42003_2021_2116_MOESM3_ESM.pdf]

## **Description of Additional Supplementary Files**

**File name:** Supplementary data 1

**Description:** Long-term culture-associated CpGs with cutoff  $R > 0.7$  or  $R < -0.7$ .

**File name:** Supplementary data 2

**Description:** Pyrosequencing results of validation dataset.

**File name:** Supplementary data 3

**Description:** Read numbers of methylation patterns in each amplicon.

**File name:** Supplementary data 4

**Description:** Unique molecular identifiers with methylation patterns of hairpin data.
